# Supplementary material
Source: Springer Nature journal article supplement (https://www.springermedizin.de/resource/supplementary/12889_2012_4900_MOESM2_ESM.pdf/9493632)

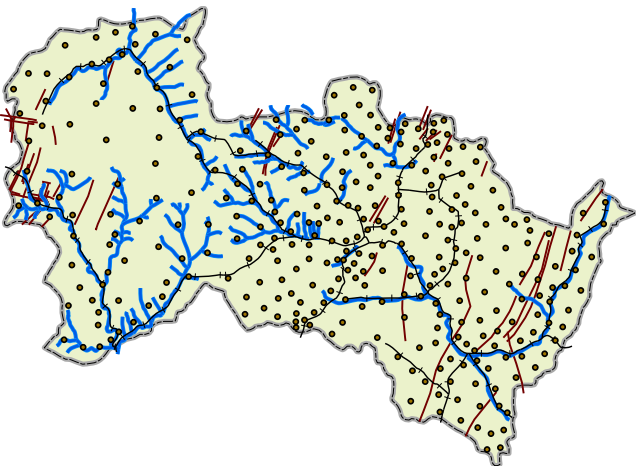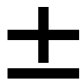

### Legend

- NTD samples
- +— Road
- River
- Fault
- county side

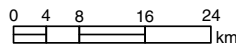

a

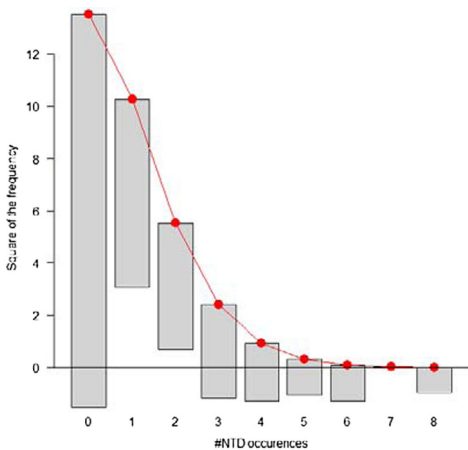

b

Supplement: MOESM2 [file 9493632]
